# Supplementary material for: An Actinidia chinensis (kiwifruit) eFP browser and network analysis of transcription factors
Source: Research Square preprint supplement (doi:10.21203/rs.3.rs-101514/v1), 2020-11-10
Supplement: Supplementary file 1 [file 5d3565e7f8dcc80fa4d8936c.xlsx]

## Sheet: ModuleColoursTable
Class	Total Expressed	black	blue	brown	green	greenyellow	grey	magenta	pink	purple	red	salmon	tan	turquoise	yellow
Total class		155	451	422	203	78	40	100	135	78	159	42	60	480	370
AP2	38	0	7	8	1	0	0	1	0	2	1	0	2	3	13
ARF	42	1	8	16	2	0	2	0	1	0	1	0	2	6	3
ARID	17	0	3	8	0	0	0	1	1	0	0	0	0	4	0
ARR	19	1	3	1	1	0	0	0	3	0	0	0	0	5	5
BCP	16	0	7	3	2	0	0	1	0	0	0	0	0	2	1
BES1	12	1	1	0	0	2	0	1	2	0	0	0	0	5	0
BHLH	292	22	32	49	14	14	3	18	18	12	15	2	7	45	41
BZIP	99	6	20	7	9	4	0	6	3	3	0	3	3	17	18
C2H2	173	7	22	19	8	2	0	13	4	3	14	2	5	39	35
C3H	125	8	37	19	4	2	1	1	4	2	2	1	3	36	5
CATMA	10	0	1	1	0	1	0	0	0	0	0	0	0	5	2
CO	16	0	4	0	3	0	0	0	7	1	0	0	1	0	0
CPP	12	0	0	10	1	0	0	0	0	0	0	0	0	1	0
DBB	32	0	10	3	0	0	0	2	9	3	1	0	0	0	4
DOF	52	9	4	11	2	1	1	7	2	1	1	0	0	4	9
E2F	14	0	3	7	0	0	0	0	0	1	1	0	0	2	0
EIL	8	0	1	0	0	0	0	0	0	0	0	0	0	7	0
ERF	208	14	22	11	24	7	14	3	9	8	7	3	6	45	35
FAR	52	0	15	8	4	0	2	0	2	1	1	0	3	16	0
GARP	64	4	7	13	10	0	1	0	3	0	1	1	2	5	17
GATA	50	3	10	19	3	3	0	1	3	0	1	1	0	3	3
GeBP	7	0	1	2	0	0	1	0	0	0	1	0	0	2	0
GFR	25	0	4	19	0	0	0	2	0	0	0	0	0	0	0
GRAS	85	1	8	12	3	4	0	1	3	2	0	0	0	16	35
HB	16	0	3	1	2	0	0	0	0	0	0	0	1	8	1
HDPhD	3	0	2	0	0	0	0	0	0	0	0	0	0	0	1
HDZIP	79	10	12	19	9	1	1	6	1	3	2	4	1	5	5
HMGB	20	0	8	4	0	0	0	2	0	1	0	0	0	5	0
HRT	1	0	0	0	0	0	0	0	0	0	0	0	0	1	0
HST	36	4	7	2	4	1	1	1	0	1	0	0	1	10	4
LAV	57	0	10	7	1	2	0	2	0	1	13	0	4	14	3
LBD	59	3	4	5	6	0	1	2	4	1	9	3	0	5	16
LFY	2	0	0	1	0	0	0	0	0	0	0	1	0	0	0
LSD	9	0	2	1	0	1	0	0	3	0	0	0	0	1	1
MICK_MADS	56	4	18	6	1	0	1	2	0	5	10	0	3	3	3
MYBR	121	2	31	18	5	2	0	6	10	4	0	0	2	36	5
NAC	147	14	18	11	16	3	1	2	7	2	17	2	1	29	24
NF	57	0	21	8	3	2	1	1	1	1	0	0	0	8	11
NIN	18	0	4	4	0	0	1	0	1	1	1	0	1	2	3
NZZ	3	0	0	0	0	0	0	0	0	0	3	0	0	0	0
PLATZ	17	1	6	2	0	1	0	1	0	0	1	0	0	2	3
R2R3Myb	210	24	18	21	41	7	3	5	11	11	18	11	2	17	21
RAV	12	0	0	0	0	0	0	0	0	0	9	0	0	3	0
S1Fa	3	0	0	1	0	0	0	0	0	0	0	0	1	1	0
SAP	2	0	0	1	0	0	0	0	0	0	1	0	0	0	0
SQBP	32	1	4	14	0	3	0	4	0	0	0	1	0	4	1
SRS	10	0	2	4	2	0	0	0	0	0	0	1	0	1	0
TALE	43	3	9	5	3	2	0	0	9	0	0	1	3	5	3
TCP	40	1	2	11	3	3	0	4	3	1	3	3	1	4	1
TRIHELIX	66	2	20	5	2	1	1	3	1	2	0	0	5	21	3
Type 1_MADS	23	0	4	1	0	0	3	0	1	1	8	0	0	3	2
VOZ	4	0	1	1	0	0	0	0	0	0	0	0	0	2	0
WHIRLY	4	0	0	1	0	0	1	0	1	1	0	0	0	0	0
WOX	18	3	0	3	1	1	0	1	0	0	5	0	0	3	1
WRKY	109	6	14	7	13	4	0	0	8	3	3	2	0	17	32
YABBY	11	4	0	1	0	0	0	0	4	0	0	2	0
ZFHD	16	8	0	3	0	0	0	0	5	0	0	0	0

## Sheet: percentages of TFs by colour
	black	blue	brown	green	greenyellow	grey	magenta	pink	purple	red	salmon	tan	turquoise	yellow
	155	451	422	203	78	40	100	135	78	159	42	60	480	370
AP2	0	18.4211	21.0526	2.63158	0	0	2.63158	0	5.26316	2.63158	0	5.26316	7.89474	34.2105		black	155
ARF	2.38095	19.0476	38.0952	4.7619	0	4.7619	0	2.38095	0	2.38095	0	4.7619	14.2857	7.14286		blue	451
ARID	0	17.6471	47.0588	0	0	0	5.88235	5.88235	0	0	0	0	23.5294	0		brown	422
ARR	5.26316	15.7895	5.26316	5.26316	0	0	0	15.7895	0	0	0	0	26.3158	26.3158		green	203
BCP	0	43.75	18.75	12.5	0	0	6.25	0	0	0	0	0	12.5	6.25		greenyellow	78
BES1	8.33333	8.33333	0	0	16.6667	0	8.33333	16.6667	0	0	0	0	41.6667	0		grey	40
BHLH	7.53425	10.9589	16.7808	4.79452	4.79452	1.0274	6.16438	6.16438	4.10959	5.13699	0.684932	2.39726	15.411	14.0411		magenta	100
BZIP	6.06061	20.202	7.07071	9.09091	4.0404	0	6.06061	3.0303	3.0303	0	3.0303	3.0303	17.1717	18.1818		pink	135
C2H2	4.04624	12.7168	10.9827	4.62428	1.15607	0	7.51445	2.31214	1.7341	8.09249	1.15607	2.89017	22.5434	20.2312		purple	78
C3H	6.4	29.6	15.2	3.2	1.6	0.8	0.8	3.2	1.6	1.6	0.8	2.4	28.8	4		red	159
CATMA	0	10	10	0	10	0	0	0	0	0	0	0	50	20		salmon	42
CO	0	25	0	18.75	0	0	0	43.75	6.25	0	0	6.25	0	0		tan	60
CPP	0	0	83.3333	8.33333	0	0	0	0	0	0	0	0	8.33333	0		turquoise	480
DBB	0	31.25	9.375	0	0	0	6.25	28.125	9.375	3.125	0	0	0	12.5		yellow	370
DOF	17.3077	7.69231	21.1538	3.84615	1.92308	1.92308	13.4615	3.84615	1.92308	1.92308	0	0	7.69231	17.3077
E2F	0	21.4286	50	0	0	0	0	0	7.14286	7.14286	0	0	14.2857	0
EIL	0	12.5	0	0	0	0	0	0	0	0	0	0	87.5	0
ERF	6.73077	10.5769	5.28846	11.5385	3.36538	6.73077	1.44231	4.32692	3.84615	3.36538	1.44231	2.88462	21.6346	16.8269
FAR	0	28.8462	15.3846	7.69231	0	3.84615	0	3.84615	1.92308	1.92308	0	5.76923	30.7692	0
GARP	6.25	10.9375	20.3125	15.625	0	1.5625	0	4.6875	0	1.5625	1.5625	3.125	7.8125	26.5625
GATA	6	20	38	6	6	0	2	6	0	2	2	0	6	6
GeBP	0	14.2857	28.5714	0	0	14.2857	0	0	0	14.2857	0	0	28.5714	0
GFR	0	16	76	0	0	0	8	0	0	0	0	0	0	0
GRAS	1.17647	9.41176	14.1176	3.52941	4.70588	0	1.17647	3.52941	2.35294	0	0	0	18.8235	41.1765
HB	0	18.75	6.25	12.5	0	0	0	0	0	0	0	6.25	50	6.25
HDPhD	0	66.6667	0	0	0	0	0	0	0	0	0	0	0	33.3333
HDZIP	12.6582	15.1899	24.0506	11.3924	1.26582	1.26582	7.59494	1.26582	3.79747	2.53165	5.06329	1.26582	6.32911	6.32911
HMGB	0	40	20	0	0	0	10	0	5	0	0	0	25	0
HRT	0	0	0	0	0	0	0	0	0	0	0	0	100	0
HST	11.1111	19.4444	5.55556	11.1111	2.77778	2.77778	2.77778	0	2.77778	0	0	2.77778	27.7778	11.1111
LAV	0	17.5439	12.2807	1.75439	3.50877	0	3.50877	0	1.75439	22.807	0	7.01754	24.5614	5.26316
LBD	5.08475	6.77966	8.47458	10.1695	0	1.69492	3.38983	6.77966	1.69492	15.2542	5.08475	0	8.47458	27.1186
LFY	0	0	50	0	0	0	0	0	0	0	50	0	0	0
LSD	0	22.2222	11.1111	0	11.1111	0	0	33.3333	0	0	0	0	11.1111	11.1111
MICK_MADS	7.14286	32.1429	10.7143	1.78571	0	1.78571	3.57143	0	8.92857	17.8571	0	5.35714	5.35714	5.35714
MYBR	1.65289	25.6198	14.876	4.13223	1.65289	0	4.95868	8.26446	3.30579	0	0	1.65289	29.7521	4.13223
NAC	9.52381	12.2449	7.48299	10.8844	2.04082	0.680272	1.36054	4.7619	1.36054	11.5646	1.36054	0.680272	19.7279	16.3265
NF	0	36.8421	14.0351	5.26316	3.50877	1.75439	1.75439	1.75439	1.75439	0	0	0	14.0351	19.2982
NIN	0	22.2222	22.2222	0	0	5.55556	0	5.55556	5.55556	5.55556	0	5.55556	11.1111	16.6667
NZZ	0	0	0	0	0	0	0	0	0	100	0	0	0	0
PLATZ	5.88235	35.2941	11.7647	0	5.88235	0	5.88235	0	0	5.88235	0	0	11.7647	17.6471
R2R3Myb	11.4286	8.57143	10	19.5238	3.33333	1.42857	2.38095	5.2381	5.2381	8.57143	5.2381	0.952381	8.09524	10
RAV	0	0	0	0	0	0	0	0	0	75	0	0	25	0
S1Fa	0	0	33.3333	0	0	0	0	0	0	0	0	33.3333	33.3333	0
SAP	0	0	50	0	0	0	0	0	0	50	0	0	0	0
SQBP	3.125	12.5	43.75	0	9.375	0	12.5	0	0	0	3.125	0	12.5	3.125
SRS	0	20	40	20	0	0	0	0	0	0	10	0	10	0
TALE	6.97674	20.9302	11.6279	6.97674	4.65116	0	0	20.9302	0	0	2.32558	6.97674	11.6279	6.97674
TCP	2.5	5	27.5	7.5	7.5	0	10	7.5	2.5	7.5	7.5	2.5	10	2.5
TRIHELIX	3.0303	30.303	7.57576	3.0303	1.51515	1.51515	4.54545	1.51515	3.0303	0	0	7.57576	31.8182	4.54545
Type 1_MADS	0	17.3913	4.34783	0	0	13.0435	0	4.34783	4.34783	34.7826	0	0	13.0435	8.69565
VOZ	0	25	25	0	0	0	0	0	0	0	0	0	50	0
WHIRLY	0	0	25	0	0	25	0	25	25	0	0	0	0	0
WOX	16.6667	0	16.6667	5.55556	5.55556	0	5.55556	0	0	27.7778	0	0	16.6667	5.55556
WRKY	5.50459	12.844	6.42202	11.9266	3.66972	0	0	7.33945	2.75229	2.75229	1.83486	0	15.5963	29.3578
YABBY	36.3636	0	9.09091	0	0	0	0	36.3636	0	0	18.1818	0	0	0
ZFHD	50	0	18.75	0	0	0	0	31.25	0	0	0	0	0	0
